# Supplementary material for: Near-infrared light-sensitive micelles for enhanced intracellular drug delivery
Source: Royal Society of Chemistry journal article supplement (doi:10.1039/c2jm00045h), 2012-01-01
Supplement: c2jm00045h.pdf [file c2jm00045h.pdf]

## Supporting Information

### **A New Near-infrared Light-sensitive Micelle for Enhanced Intracellular Drug Delivery**

*Gong-Yan Liu, Chao-Jian Chen, Dan-Dan Li, Shan-Shan Wang, Qiao Jin, and Jian Ji\**

Department of Polymer Science and Engineering, MOE Key laboratory of Macromolecular Synthesis and Functionalization. Zhejiang University, Hangzhou 310027, China.

Fax: (+) 86 571 87953729

E-mail: [jjjian@zju.edu.cn](mailto:jjjian@zju.edu.cn).

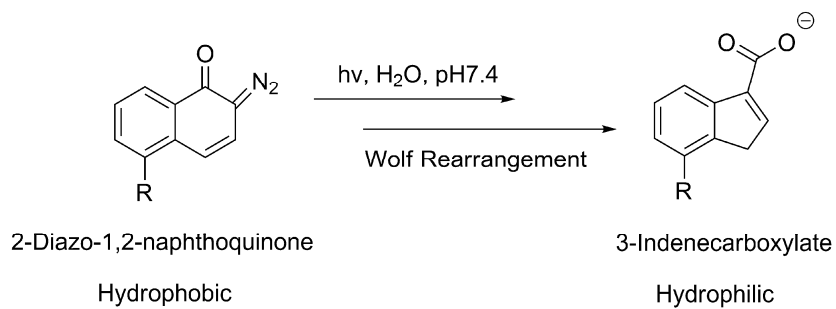

**Scheme S1.** Structural change of DNQ after Wolff Rearrangement.

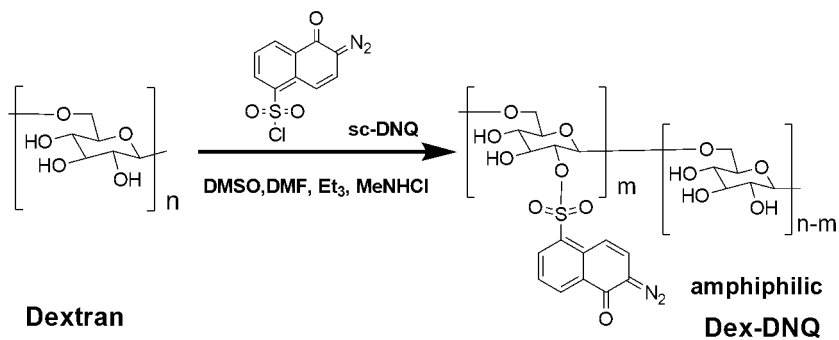

**Scheme S2.** Synthesis of Dex-DNQ amphiphilic copolymers.

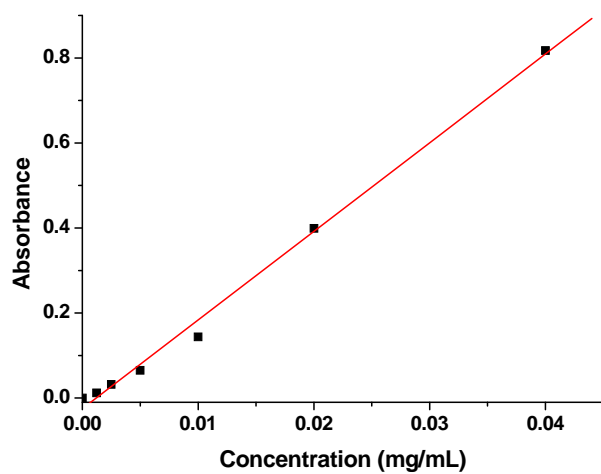

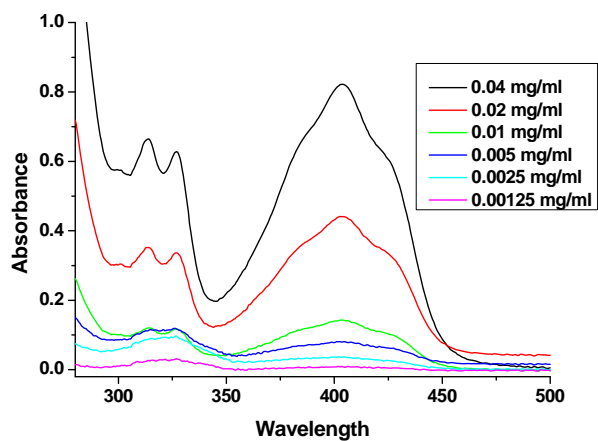

**Fig. S1.** (A) Linear relationship between the UV absorbance at 403 nm and the concentration of sc-DNQ in DMSO; (B) UV-vis spectra of sc-DNQ in DMSO at various concentrations.

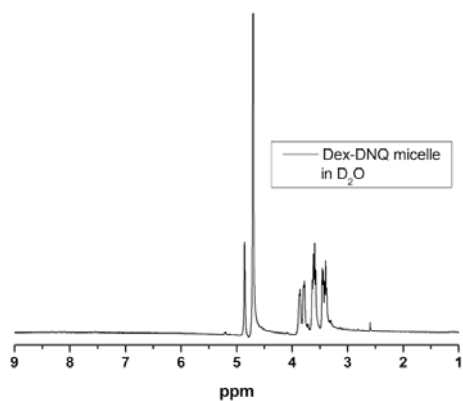

(a)

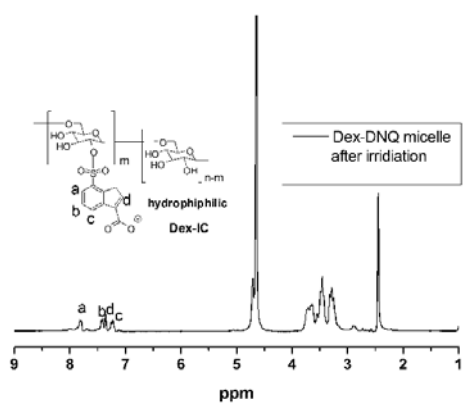

(b)

**Fig. S2.** <sup>1</sup>H NMR spectra of Dex-DNQ micelle in D<sub>2</sub>O (a) and the micelle changed into hydrophilic Dex-IC chains after irradiation (b).
